# Supplementary material for: Intermittent Bictegravir/Emtricitabine/Tenofovir Alafenamide Treatment Maintains High Level of Viral Suppression in Virally Suppressed People Living with HIV
Source: MDPI journal article supplement (doi:10.3390/jpm13040583), 2023-03-27

**Supplementary Figure S1.** Plasma  $C_{24h}$  (24h after the last drug intake) and  $C_t$  (3 days or 2 days post-dose, at the end of the discontinuation window) of bicitegravir (BIC), emtricitabine (FTC) and tenofovir (TFV) determined in 38 patients.

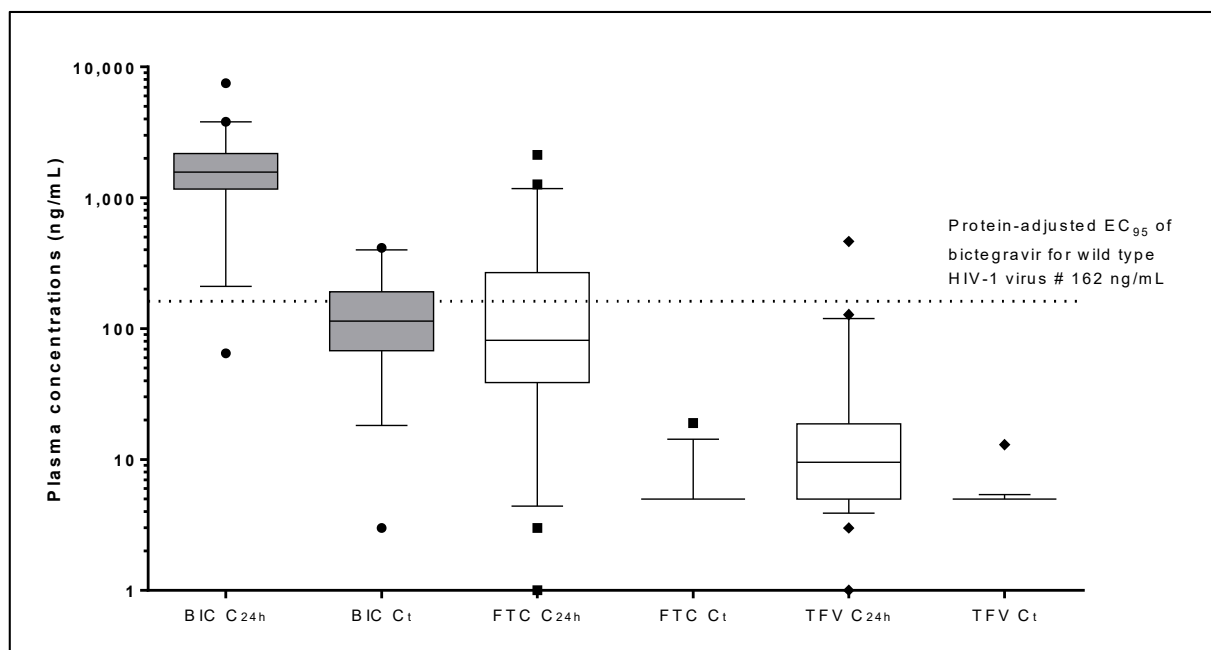

Supplement: s1 [file s1]
